# Supplementary material for: DNA Barcodes of Mansonia (Mansonia) Blanchard, 1901 (Diptera, Culicidae)
Source: MDPI journal article supplement (doi:10.3390/genes14061127), 2023-05-23
Supplement: s1 [file s1]

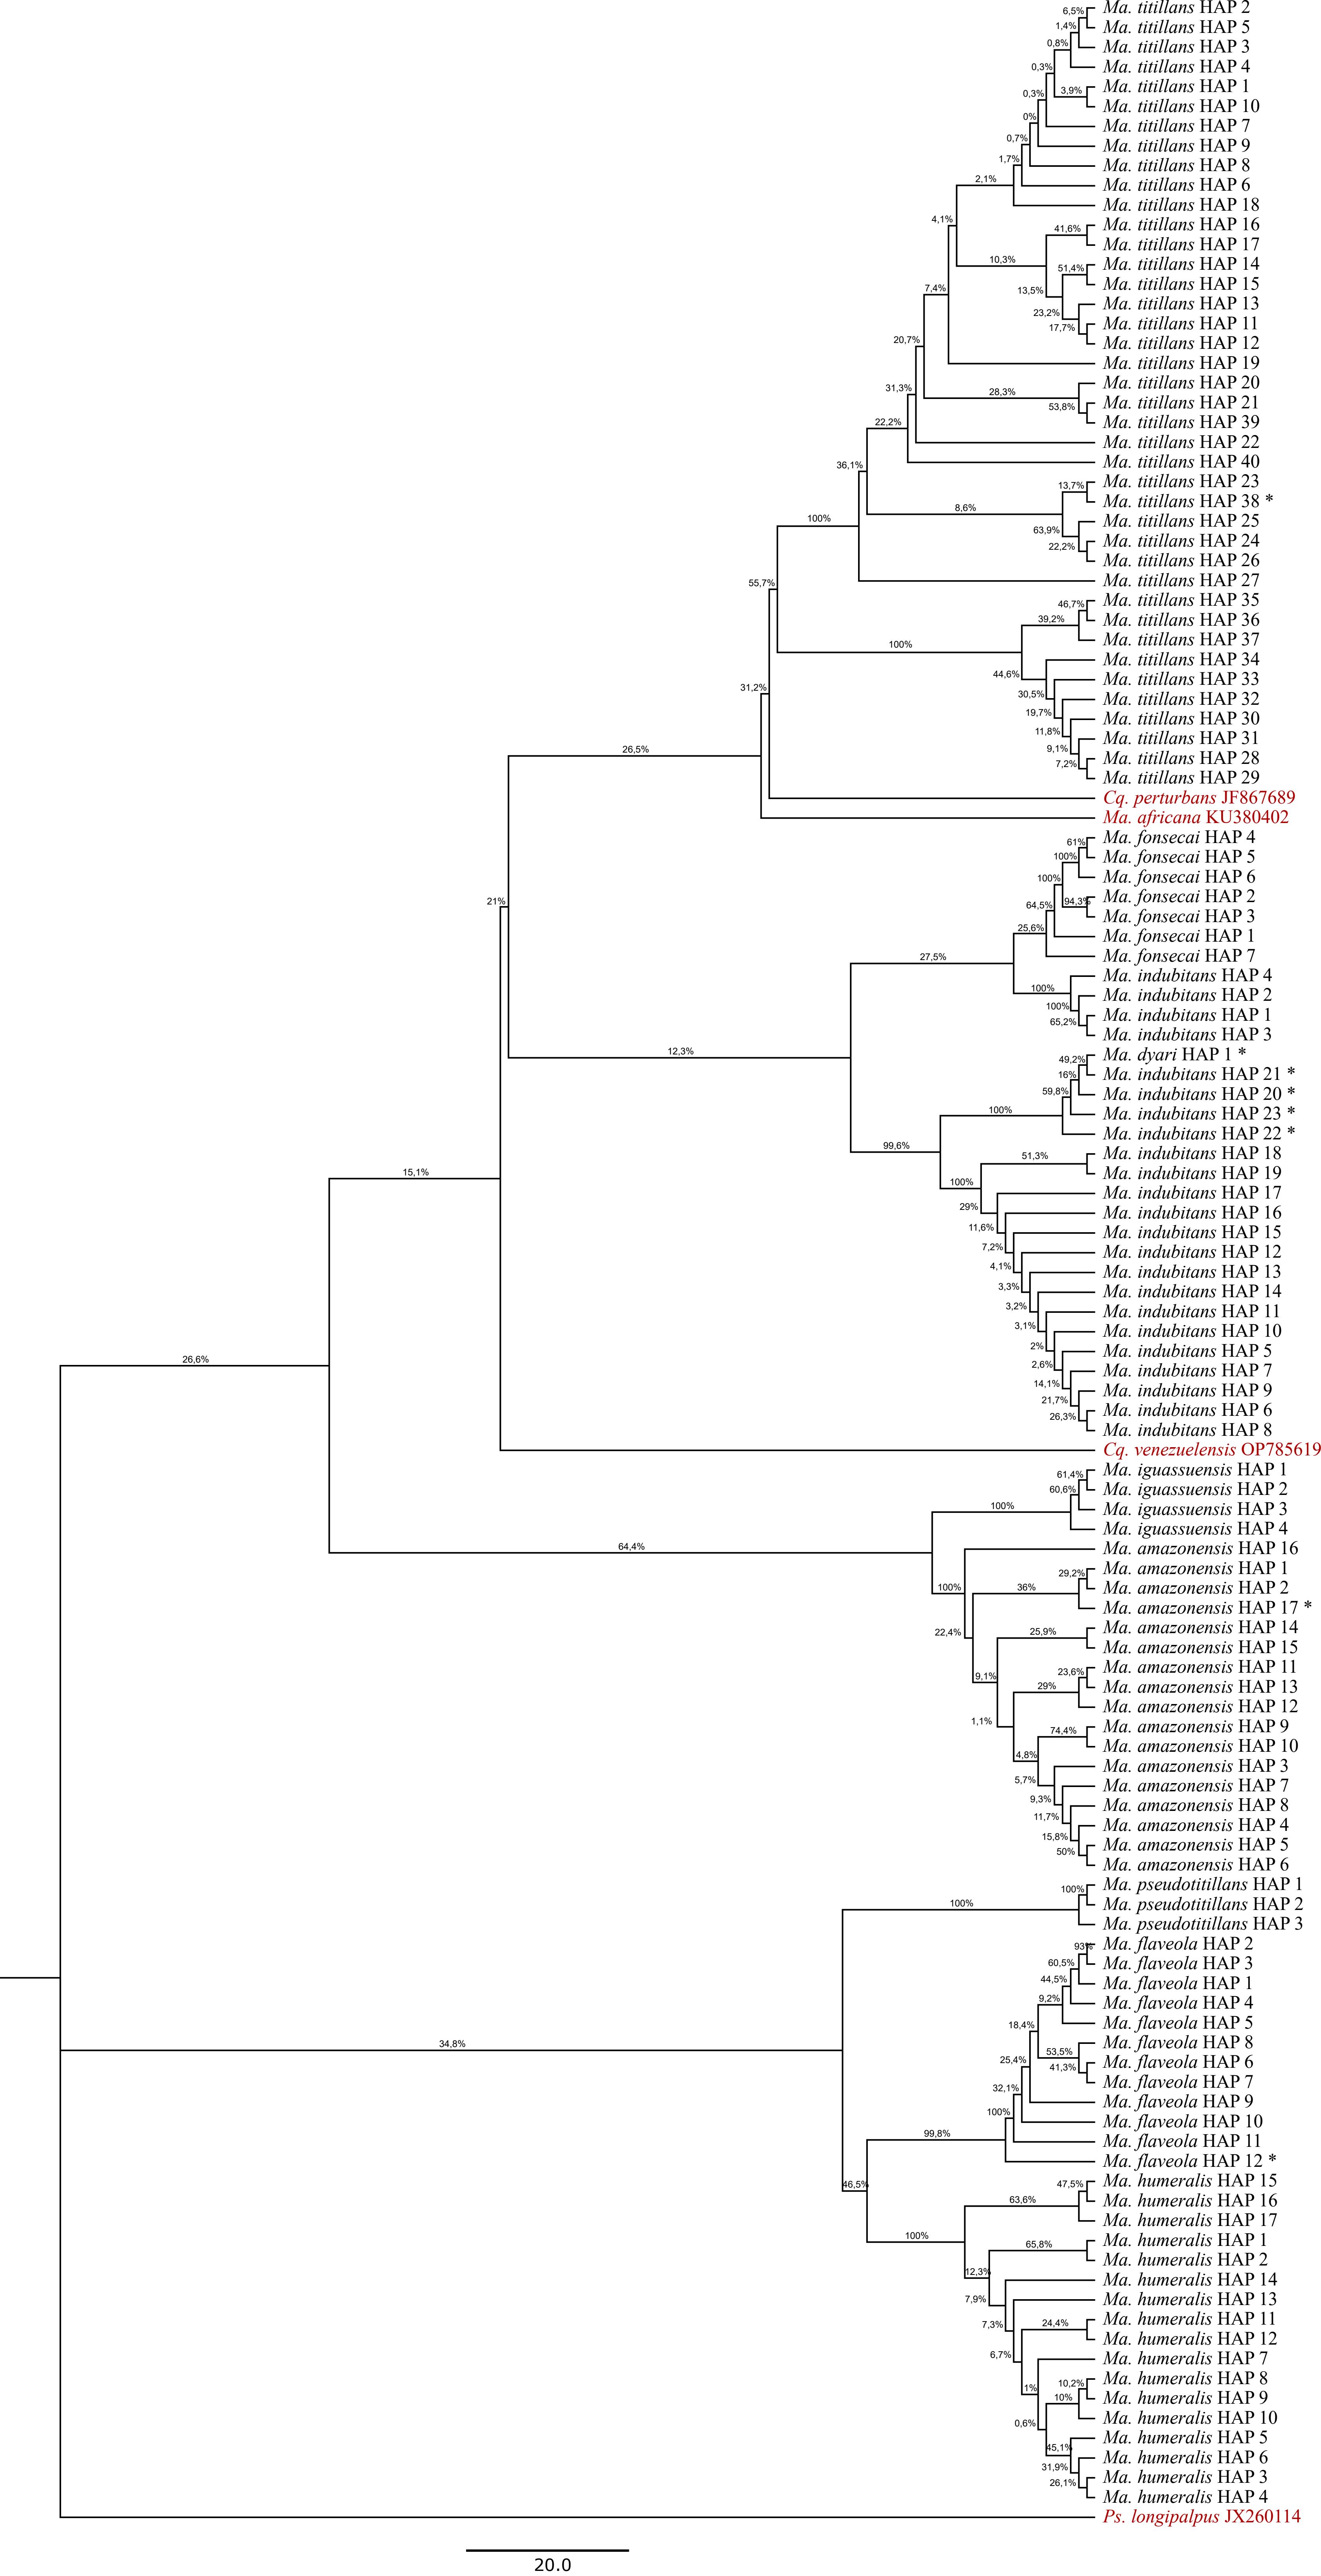

**Figure S1.** NJ topology estimated by MEGA X using K2p genetic distances (scale bar) with 124 *Mansonia* (*Mansonia*) spp. COI haplotype sequences, eight of which represent sequences extracted from GenBank and BOLD (asterisk). The tree is rooted on *Ps. longipalpus* sequence, which, like those of other outgroup members, is highlighted in red. Bootstrap values (1,000 replicates) are shown above or to the left of the branches.
